# Supplementary material for: Gatekeeper training for vendors to reduce pesticide self-poisoning in rural South Asia: a study protocol for a stepped-wedge cluster randomised controlled trial
Source: HighWire-hosted journal article supplement (doi:10.1136/bmjopen-2021-054061), 2022-04-01
Supplement: bmjopen-2021-054061supp001_data_supplement.pdf [file bmjopen-2021-054061supp001_data_supplement.pdf]

Adult patient consent for Vendor cRCT  
Version 0.5 25 SEP 2018

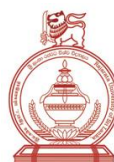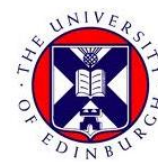

DEPARTMENT OF COMMUNITY MEDICINE  
FACULTY OF MEDICINE AND ALLIED SCIENCES  
RAJARATA UNIVERSITY OF SRI LANKA

## PARTICIPANT'S CONSENT FORM – ADULT PATIENTS (≥18 YEARS)

### STUDY ON WHETHER PESTICIDE VENDOR TRAINING CAN REDUCE PESTICIDE SELF-POISONING IN RURAL SRI LANKA

| Investigator        | Telephone number | Address                                                                                                           |
|---------------------|------------------|-------------------------------------------------------------------------------------------------------------------|
| Manjula Weerasinghe | 077 3230888      | Department of Community Medicine,<br>Faculty of Medicine and Allied Sciences,<br>Rajarata University of Sri Lanka |

Please affirm with your initials

|                                                                                                                                                                                                                                                                                                           |                               |
|-----------------------------------------------------------------------------------------------------------------------------------------------------------------------------------------------------------------------------------------------------------------------------------------------------------|-------------------------------|
| I have read the Patient information sheet version 0.5 (25 SEP 2018)                                                                                                                                                                                                                                       | <input type="text"/>          |
| I have had the opportunity to ask questions and discuss the study.                                                                                                                                                                                                                                        | <input type="text"/>          |
| I have received satisfactory answers to the questions I asked about the project                                                                                                                                                                                                                           | <input type="text"/>          |
| Who explained the study to you? .....                                                                                                                                                                                                                                                                     |                               |
| I understand that I am free to leave the study without giving any reason.                                                                                                                                                                                                                                 | <input type="text"/>          |
| I agree to take part on my own wishes                                                                                                                                                                                                                                                                     | <input type="text"/>          |
| I understand that the information I give is confidential.                                                                                                                                                                                                                                                 | <input type="text"/>          |
| I understand that relevant sections of my medical notes and data collected during the study may be looked at by individuals from the Sponsors (the University of Edinburgh) where it is relevant to my taking part in this research. I give permission for those individuals to have access to my records | <input type="text"/>          |
| I give my consent to take part in the study and this will include:                                                                                                                                                                                                                                        |                               |
| Interviews                                                                                                                                                                                                                                                                                                | Yes / No <input type="text"/> |

|                 |                             |
|-----------------|-----------------------------|
| Name .....      | Person taking consent ..... |
| Signature ..... | Signature .....             |
| Date .....      | Date .....                  |

Adult patient consent for Vendor cRCT  
Version 0.5 25 SEP 2018

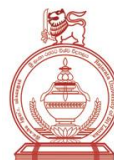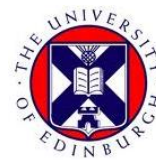

Original (x1) to be retained in site file. Copy (x1) to be included in patient notes. Copy (x1) to be retained by the participant.

**If you have any complaints about this research or its conduct, please contact:**

Secretary,  
Ethics Review Committee,  
Faculty of Medicine and Allied Sciences,  
Rajarata University of Sri Lanka

Phone number: +94(0) 25 2053633 (please contact during working hrs 8 am – 4 pm)  
E-mail: [ethicsreviewcommittee@gmail.com](mailto:ethicsreviewcommittee@gmail.com)

**or**

the University of Edinburgh's Research Governance team via email at: [resgov@accord.scot](mailto:resgov@accord.scot)
